# Supplementary material
Source: Springer Nature journal article supplement (https://www.springermedizin.de/resource/supplementary/13053_2013_481_MOESM1_ESM.pdf/9673846)

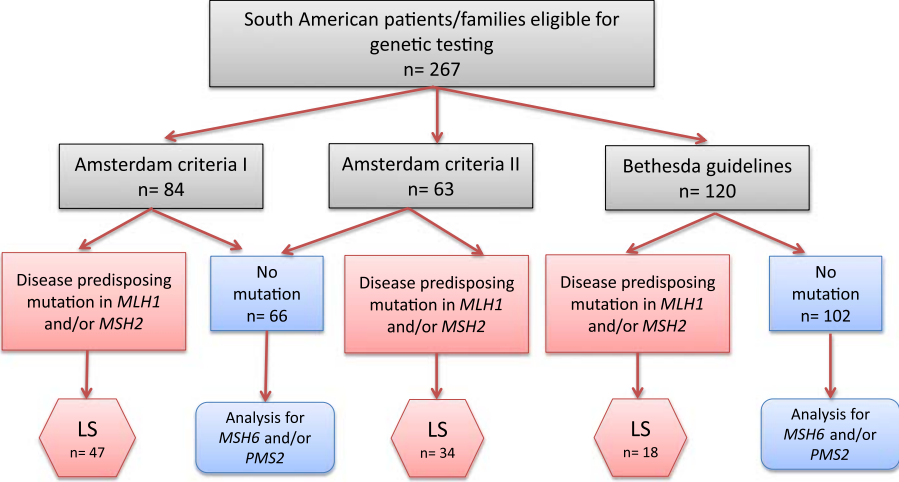

Supplement: MOESM1 [file 9673846]
